# Supplementary material for: Copper–Vit B3 MOF preparation, characterization and catalytic evaluation in a one-pot synthesis of benzoxanthenones with docking validation as anti H. pylori
Source: Royal Society of Chemistry journal article supplement (doi:10.1039/d4ra03468f), 2024-01-01
Supplement: d4ra03468f1.pdf [file d4ra03468f1.pdf]

**Copper-Vit B<sub>3</sub> MOF preparation, characterization and catalytic evaluation in one-pot synthesis of benzoxanthenones with docking validation as anti *H-pylori***

Asma S. Al-Wasidi,<sup>a</sup> Mahmoud Tarek,<sup>b,\*</sup> Gehad E. Said,<sup>b,\*</sup> Ahmed M. Naglah,<sup>c,\*</sup>

Abdulrahman A. Almehezia,<sup>c</sup> and Tamer K. Khatab<sup>d</sup>

<sup>a</sup>Department of Chemistry, College of Science, Princess Nourah Bint Abdulrahman University, Riyadh 11671, Saudi Arabia; [asalwasidi@pnu.edu.sa](mailto:asalwasidi@pnu.edu.sa) (**A.S.A.**);

<sup>b</sup>Chemistry Department, Faculty of Science, Mansoura University, 35516 Mansoura, Egypt; [gehadsaid@mans.edu.eg](mailto:gehadsaid@mans.edu.eg) (**G.E.S.**), [mahmoudtarek.tm@gmail.com](mailto:mahmoudtarek.tm@gmail.com) (**M.T.**)

<sup>c</sup>Drug Exploration and Development Chair (DEDC), Department of Pharmaceutical Chemistry, College of Pharmacy, King Saud University, P.O. Box 2457, Riyadh 11451, Saudi Arabia; [anaglah@ksu.edu.sa](mailto:anaglah@ksu.edu.sa) (**A.M.N.**), [mehizia@ksu.edu.sa](mailto:mehizia@ksu.edu.sa) (**A.A.A.**)

<sup>d</sup>Organometallic and Organometalloid Chemistry Department, National Research Centre, 33 ElBehouth St., Dokki, 12622 Giza, Egypt; [Tamer\\_khatab@hotmail.com](mailto:Tamer_khatab@hotmail.com)  
(**T.K.Khatab**)

## Experimental

All melting points were evaluated using electric Gallenkamp (Germany) apparatus. The <sup>1</sup>H-NMR and <sup>13</sup>C-NMR spectra were run on a Bruker Avance III spectrophotometer at 400 and 100 MHz, respectively. The elemental microanalytical data were measured at the Microanalytical Unit, Cairo University on Vario, Elementar apparatus (Shimadzu). TLC was used to monitor the reaction mixtures using silica gel-coated plates and irradiation with UV-Lamp for visualization. The solvents and reagents were purchased from sigma Aldrich and fluka companies.

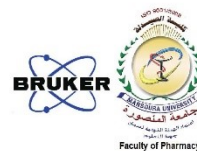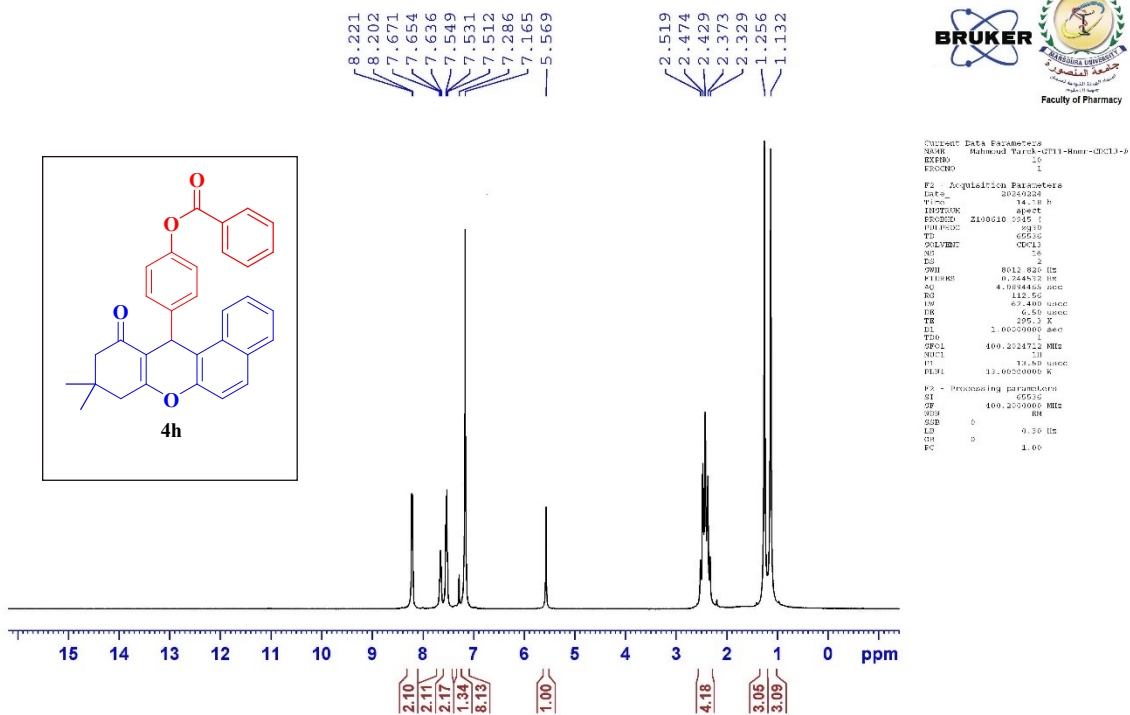

<sup>1</sup>H NMR spectrum of compound 4h

Mahmoud Tarek-GT11-CNMR-AF

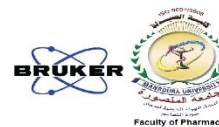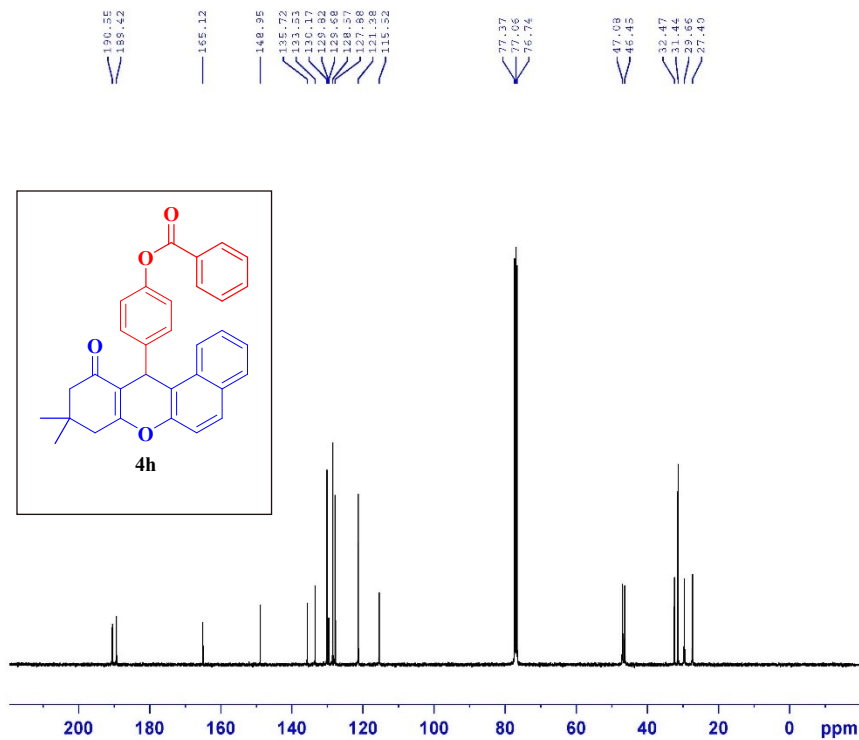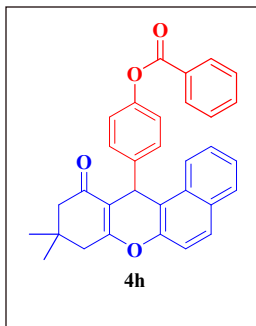

Current Data Parameters  
NAME Mahmoud Tarek-GT11-CNMR-AF  
EXPRNO 10  
PROCNO 1

F2 - Acquisition Parameters  
Date 20240229  
Time 0.57 h  
INSTRUM spect  
PROBHD Z108618\_0915 (   
PULPROG zgpg30  
TD 65536  
SOLVENT CDCL3  
NS 2000  
DS 4  
SWH 24038.461 Hz  
FIDRES 0.733596 Hz  
AQ 1.3631488 sec  
RG 197.77  
DW 20.800 usec  
DR 6.50 usec  
TE 296.9 K  
D1 2.00000000 sec  
D11 0.03000000 sec  
TDO 1  
SFO1 100.6404331 MHz  
NUC1 13C  
P1 10.00 usec  
PLA1 47.00000000 W  
SFO2 400.2016008 MHz  
NUC2 1H  
CPDPRG2 waltz16  
PCPD2 20.00 usec  
PLA2 13.00000000 W  
PLA12 0.29249999 W  
PLA13 0.14713000 W

F2 - Processing parameters  
SI 32768  
SF 100.6303700 MHz  
WDW EM  
SSB 0  
LE 1.00 Hz  
GB 0  
PC 1.40

<sup>13</sup>C NMR spectrum of compound 4h

Gehad Ibrahim-GT12-Re-CDCL3-HNMR-EA

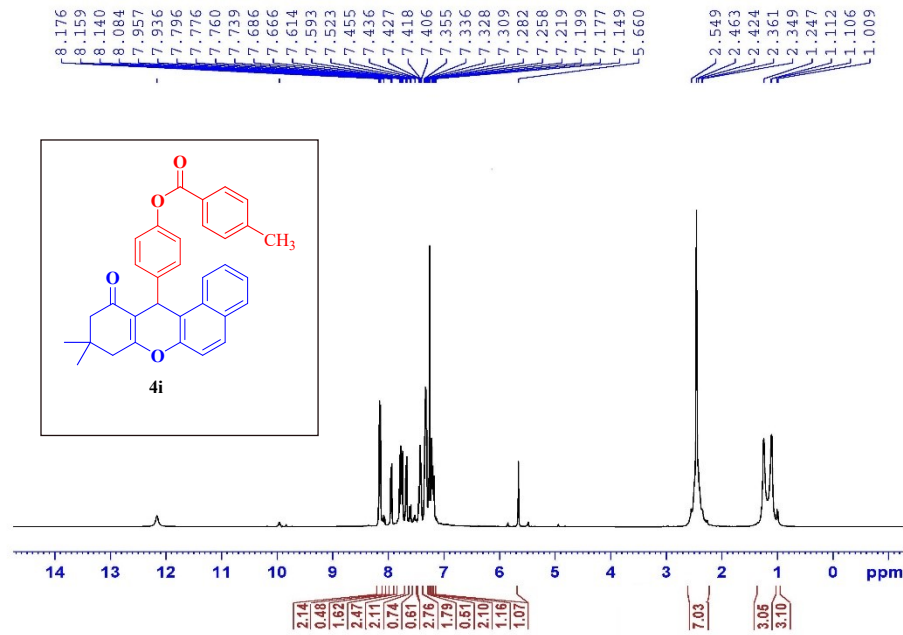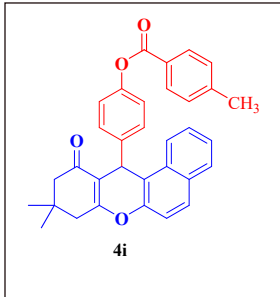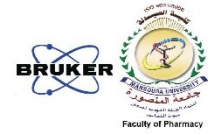

```

===== Data Parameters =====
NAME: 0103 20120413 0113 Re 100% 8000 EA
EXPNO: 1
PROCNO: 1
F2 - Acquiring Parameters
Date_ 20120413
Time: 11:25:10
INSTRUM: zgpg30
PROBHD: zgpg30mm5
PULPROG: zgpg30
TE: 300.2
===== Processing Parameters =====
SI: 32768
SF: 800.132450
AQ: 0.040864
RG: 655
AQ2: 0.020432
SFO2: 400.066225
WDW: EM
SSB: 0
GB: 0
PC: 1.500
=====
    
```

<sup>1</sup>H NMR spectrum of compound 4i

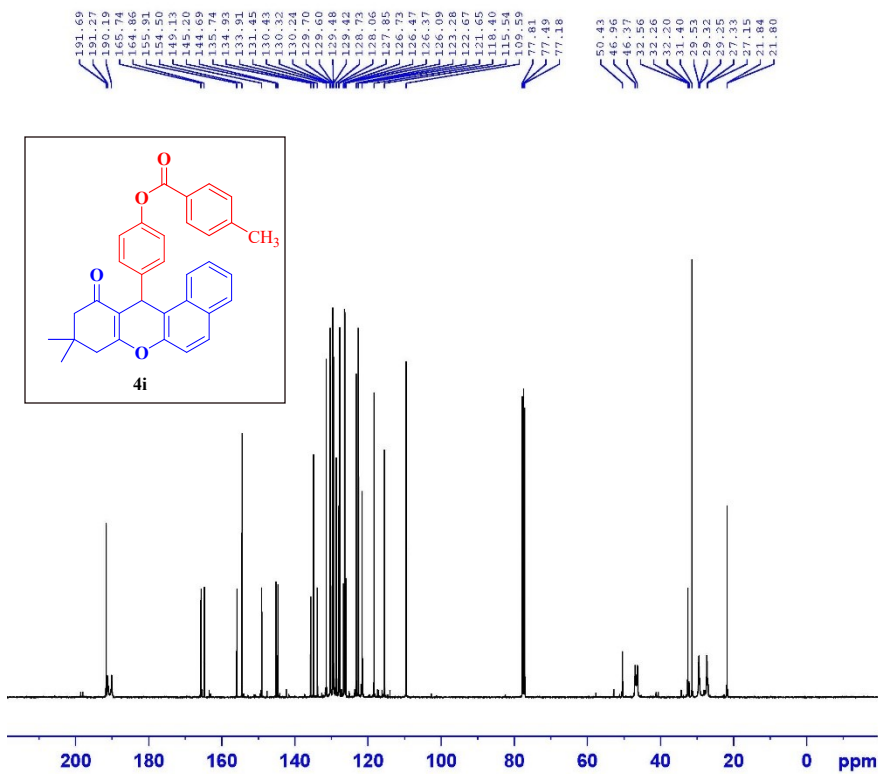

<sup>13</sup>C NMR spectrum of compound 4i

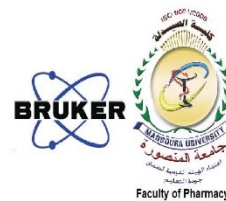

Current Data Parameters  
 NAME Mansour\_Tareq-UT 12-Re-Cl3-BK  
 EXPMO 10  
 PRODMO 1

F2 - Acquisition Parameters  
 Date\_ 20240116  
 Time\_ 19:28 h  
 INSTRUM spect  
 FREQRC 210031.08416 MHz  
 PULPROG zgpg30  
 TD 65536  
 SOLVENT CDCl3  
 NS 2200  
 DS 4  
 SWH 24036.461 Hz  
 FIDRES 0.733526 Hz  
 AQ 1.1631488 sec  
 RG 187.77  
 DW 20.800 usec  
 DE 6.30 usec  
 TE 296.2 K  
 D1 2.00000000 sec  
 D11 0.03000000 sec  
 D2 1  
 TDS 1  
 SFO1 100.6304331 MHz  
 NDCL 130  
 FI 10.00 usec  
 PLW1 47.00000000 MHz  
 SP02 400.2016008 MHz  
 NUC1 13  
 CPDPRG2 waltz16  
 PCPD2 30.00 usec  
 PLW2 13.00000000 MHz  
 PLW12 0.29249999 MHz  
 PLW13 0.14713000 MHz

F2 - Processing parameters  
 SI 32768  
 SF 100.6303700 MHz  
 WDW RM  
 SSB 0  
 LB 1.00 Hz  
 GB 0  
 PC 1.40

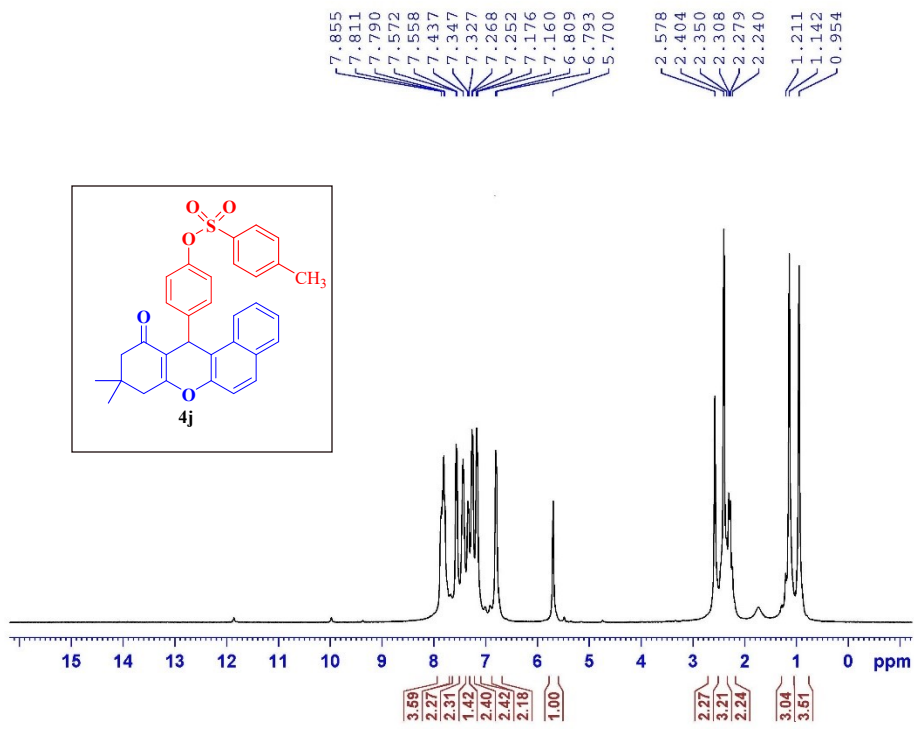

```

Current Data Parameters
NAME: Sulamoni_Tarek_0713_Hmzr_C0613_4
EXPNO: 10
PROCNO: 1
F2 - Acquisition Parameters
Date_ : 20240228
Time: 9:36 h
INSTRUM: spect
PROBHD: R106H1B_2942_1
PULPROG: zgpg30
TD: 65536
SOLVENT: CDCl3
NS: 36
DS: 2
SWH: 8012.820 MHz
FIDRES: 0.244592 Hz
AQ: 4.2594465 sec
RG: 48.37
RG2: 62.500 usec
DE: 6.50 usec
TE: 298.2 K
TEC: 1.00000000 sec
NUC1: 13C
NUC2: 13C
P1: 13.50 usec
PCAL: 13.00000000 W
F2 - Processing parameters
SI: 65536
SF: 500.2000000 MHz
AQ: 4.2594465 sec
RG: 48.37
RG2: 62.500 usec
DE: 6.50 usec
TE: 298.2 K
TEC: 1.00000000 sec

```

**<sup>1</sup>H NMR spectrum of compound 4j**

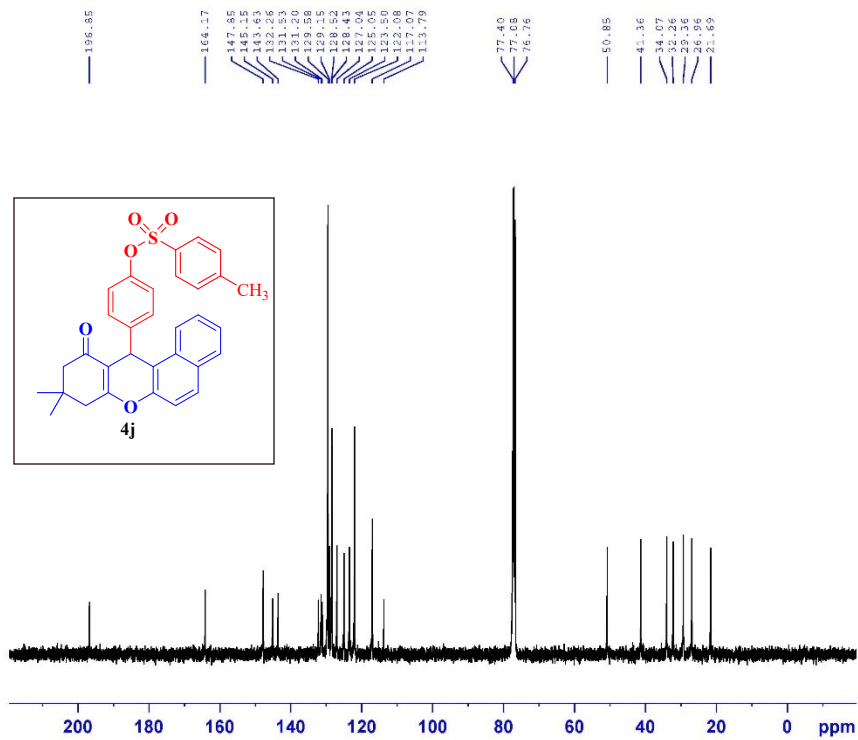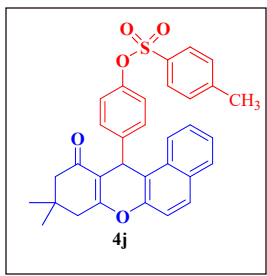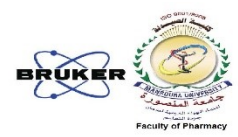

Current Data Parameters  
 NAME Mahmoud Tarek-G113-CNMR-AP  
 EXPRN 10  
 PROCNO 1

F2 - Acquisition Parameters  
 Date\_ 20240229  
 Time 10.15 h  
 INSTRUM spect  
 PROBHD Z108618\_0945 ( )  
 PULPROG zgpg30  
 TD 65536  
 SOLVENT CDCl3  
 NS 767  
 DS 4  
 SWH 24038.467 Hz  
 FIDRES 0.733596 Hz  
 AQ 1.3631488 sec  
 RG 197.77  
 DW 20.600 usec  
 DE 6.50 usec  
 TX 296.4 K  
 D1 2.0000000 sec  
 D11 0.0300000 sec  
 TD0 1  
 SF01 100.6104331 MHz  
 NUC1 13C  
 P1 10.00 usec  
 PLM1 47.0000000 W  
 SF02 100.2016008 MHz  
 NUC2 1H  
 CDEPRG12 waltz16  
 PCPD2 90.00 usec  
 PLM2 13.0000000 W  
 PLM3 0.29249999 W  
 PLM13 0.14713000 W

F2 - Processing parameters  
 S1 32768  
 SF 100.6103700 MHz  
 NDM EM  
 SSB 0  
 LB 1.00 Hz  
 GB 0  
 PC 1.40

<sup>13</sup>C NMR spectrum of compound 4j

2D interaction between the prepared ligands and “*Helicobacter pylori* Type II dehydroquinase”

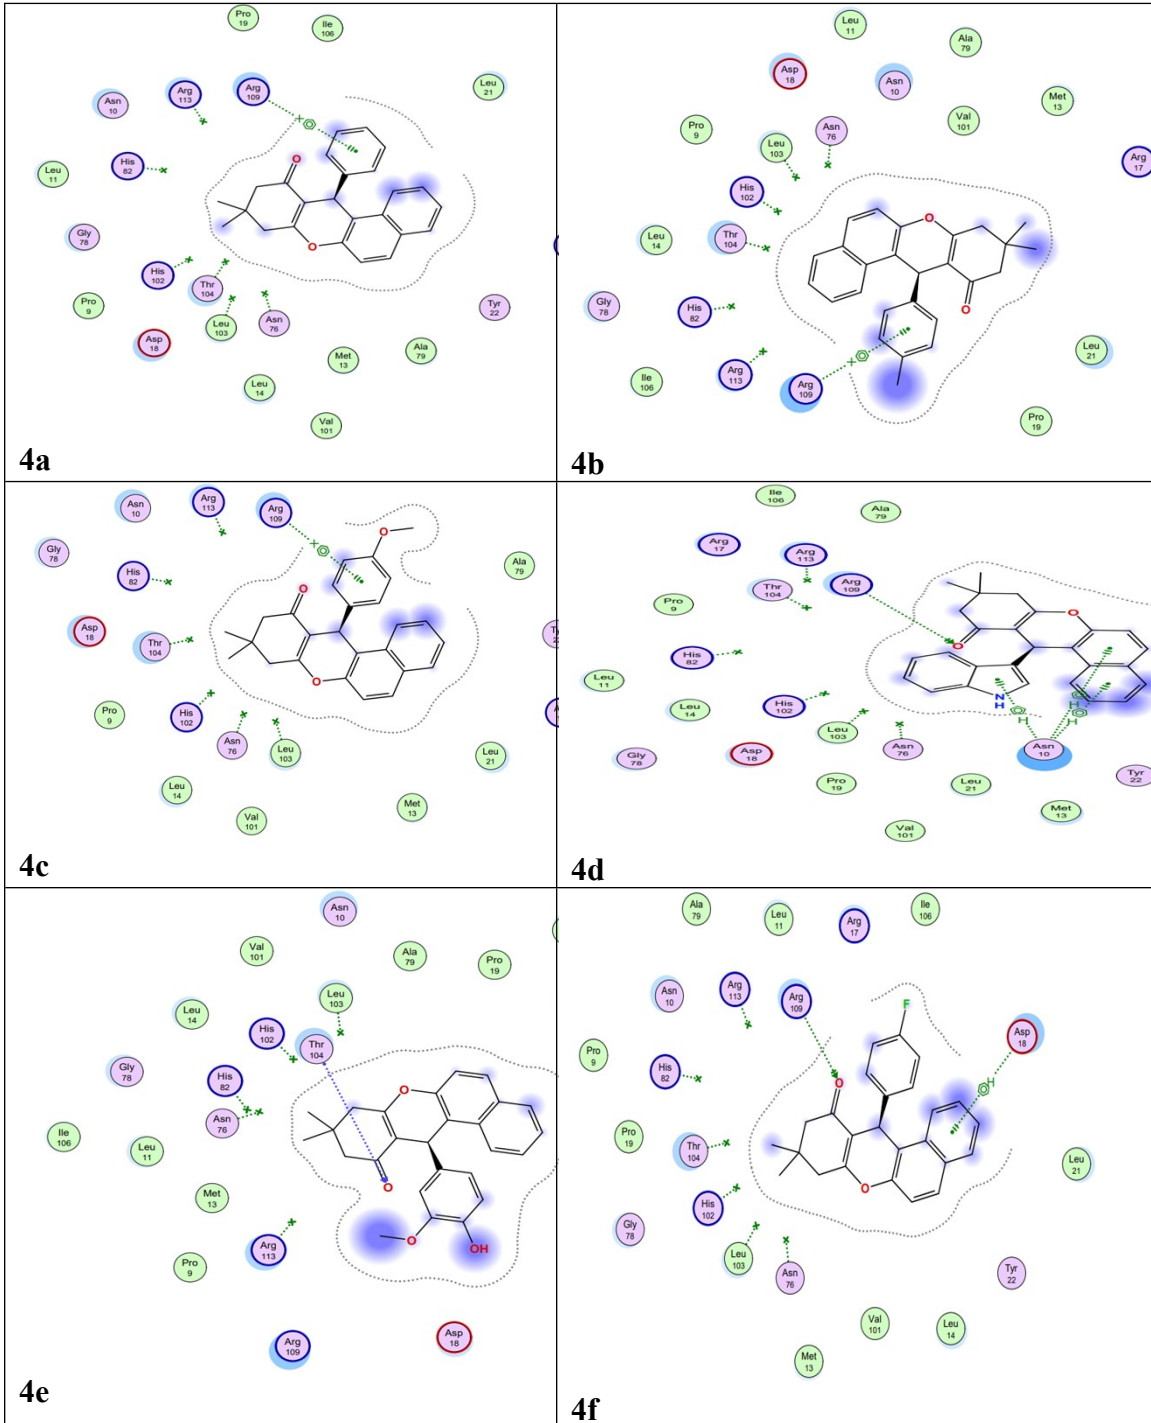



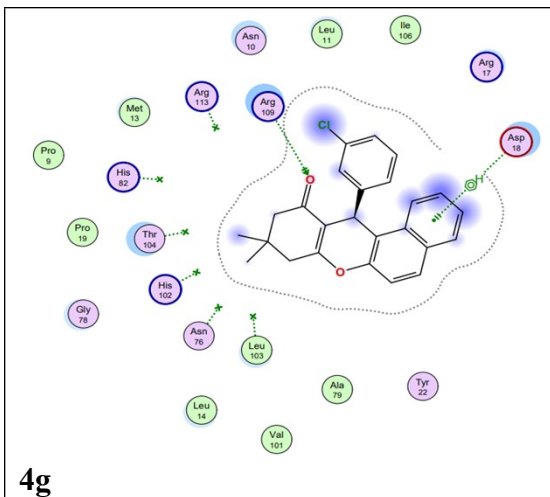

4g

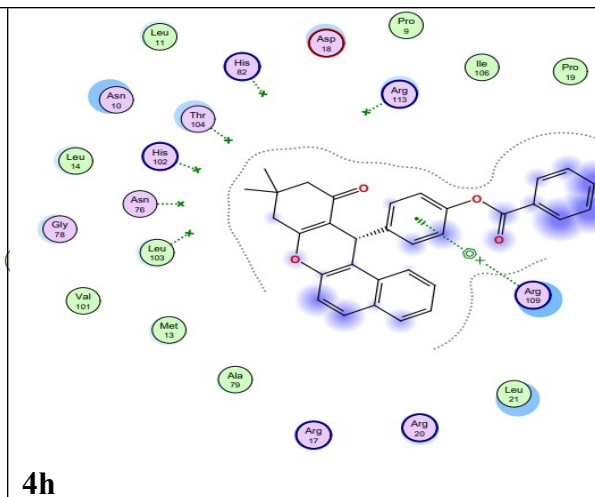

4h

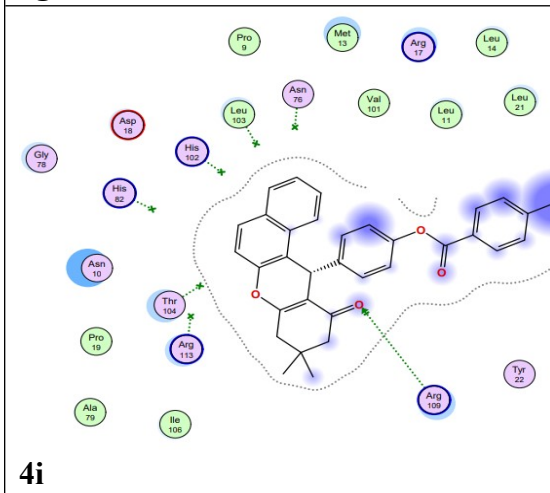

4i

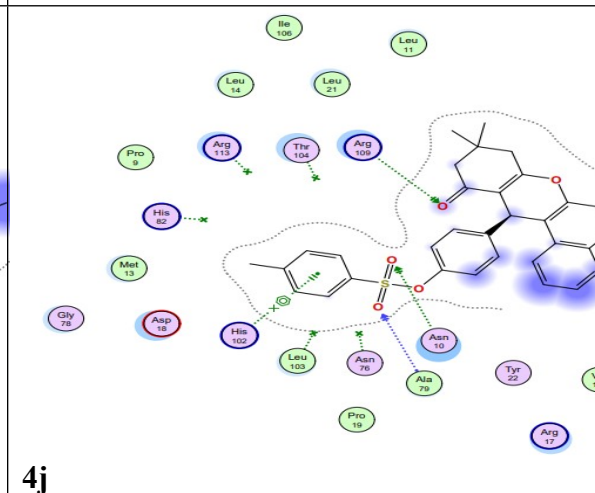

4j
